# Supplementary material
Source: PubMed Central journal article supplement (PMC5544384)
Supplement: NIHMS882371-supplement-supplement_1.pdf [file NIHMS882371-supplement-supplement_1.pdf]

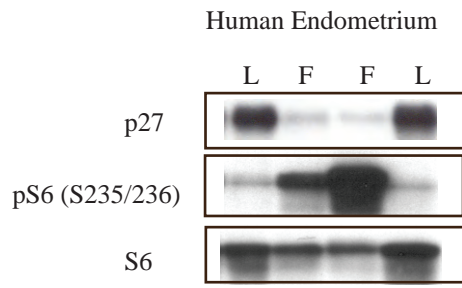

Supplemental Figure S1

Supplemental Table S1. Hormone levels in Intervention Study Rats.

| Number of staged rats (n) | Diet               | Proestrus | Estrus | Metestrus | Diestrus | Average E2 (ng/ml) | Average P4 (ng/ml) |
|---------------------------|--------------------|-----------|--------|-----------|----------|--------------------|--------------------|
| 8                         | ad libidum         | 3         | 1      | 3         | 1        | 8.8                | 17.6               |
| 10                        | calorie restricted | 3         | 2      | 4         | 1        | 7.7                | 20.4               |
